# Supplementary material
Source: publisher figshare collection journal article supplement (https://rs.figshare.com/ndownloader/files/24263582)

Fig. S2 Soil-core OTUs

A

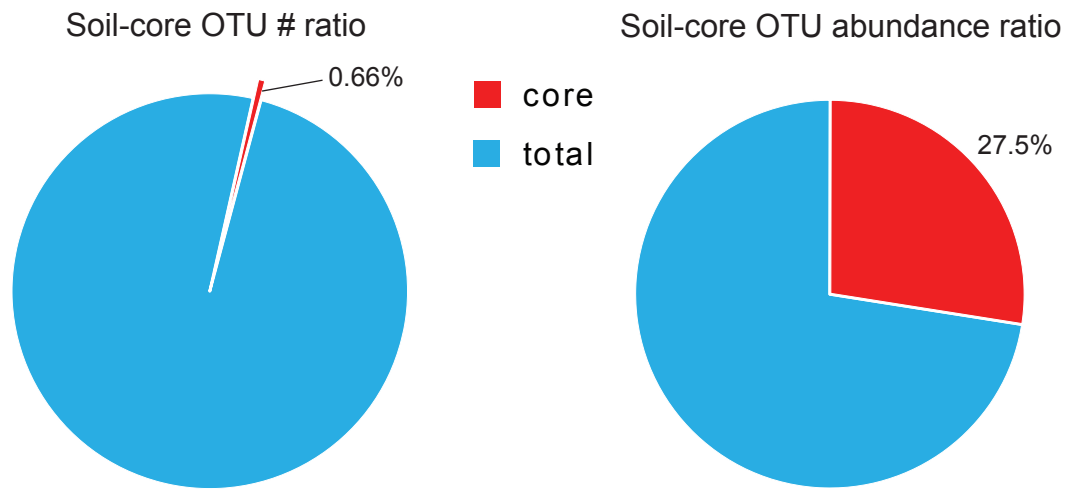

B

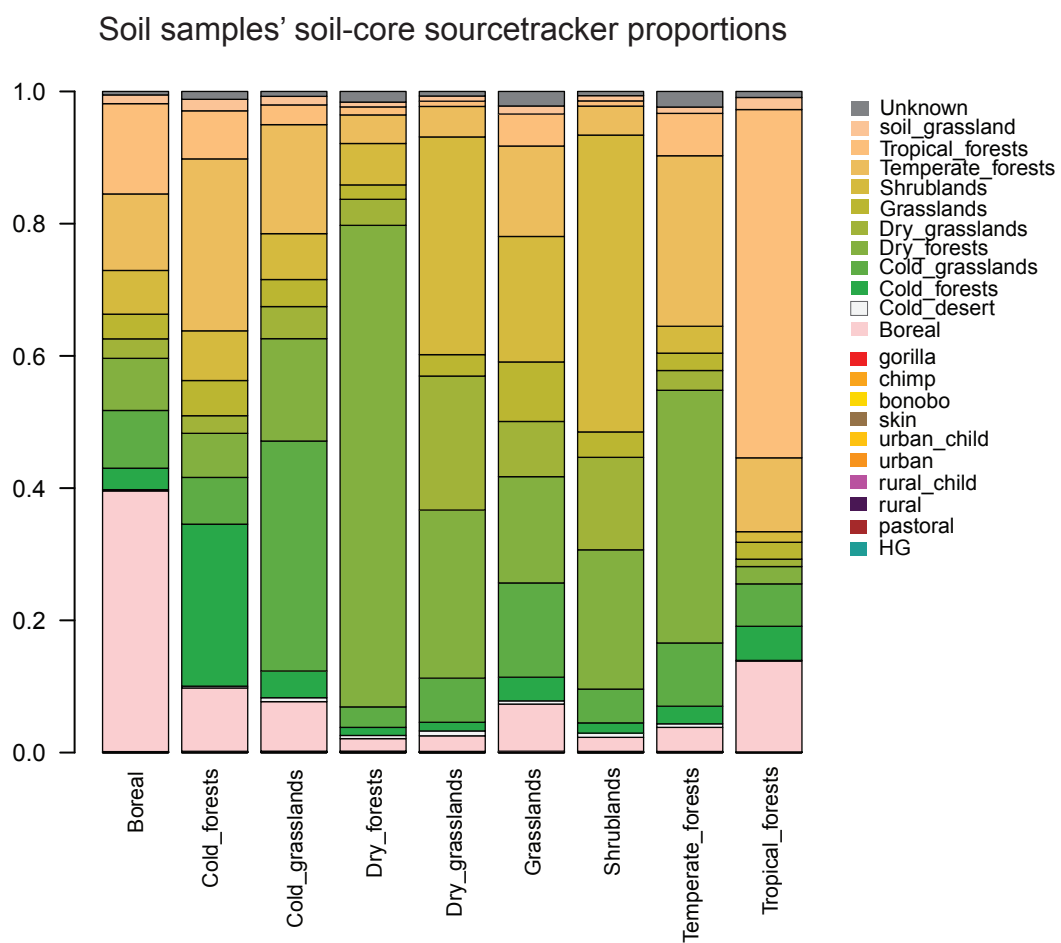

Supplement: Supplementary file 1 [file 24263582]
